# Supplementary material
Source: HighWire-hosted journal article supplement (https://www.cfp.ca/highwire/filestream/33884/field_highwire_adjunct_files/0/832_CommonConditions_PC.pdf)
Supplement: 832_CommonConditions_PC.pdf [file 832_CommonConditions_PC.pdf]

## **Supplemental File: Common Conditions in Primary Care**

### **Index**

|                                                       |         |
|-------------------------------------------------------|---------|
| Search strategy                                       | Page 1  |
| Diagnostic coding legend for general conditions       | Page 5  |
| Diagnostic coding legend for specific conditions      | Page 8  |
| Characteristics of included studies                   | Page 13 |
| Quality assessment of included studies                | Page 14 |
| Proportion of reasons for visits and problems managed | Page 15 |
| Subgroup data                                         | Page 16 |
| Seasonality subgroups                                 | Page 16 |
| Clinician gender                                      | Page 17 |
| Patient gender                                        | Page 18 |
| Urban vs rural                                        | Page 19 |
| Ranking of general categories of conditions           | Page 20 |

## Supplement 1. Search strategy.

### Databases searched:

OVID Medline (1946 to January 25, 2016), OVID EMBASE (1974 to January 25, 2016), SCOPUS, CINAHL (EBSCO, January 26, 2016), OVID EBM Reviews - Cochrane Database of Systematic Reviews (2005 to January 13, 2016), EBM Reviews - ACP Journal Club (1991 to February 2015), EBM Reviews - Database of Abstracts of Reviews of Effects (1st Quarter 2015), EBM Reviews - Cochrane Central Register of Controlled Trials (January 2015), EBM Reviews - Cochrane Methodology Register (3rd Quarter 2012), EBM Reviews - Health Technology Assessment (1st Quarter 2015), EBM Reviews - NHS Economic Evaluation Database (1st Quarter 2015) and Sociological Abstracts

### Medline

Database: Ovid MEDLINE(R) In-Process & Other Non-Indexed Citations, Ovid MEDLINE(R) Daily and Ovid MEDLINE(R) <1946 to 2016 January 25 Present>

Search Strategy:

- 1 (office visit\* or general practi\* or primary care or primary health care or family medicine or family doctor\* or family physician\* or family practice\* or medical office or medical clinic or primary medical care).ti,ab. (172818)
- 2 exp \*Primary Health Care/ or \*"Office Visits"/ (68696)
- 3 exp \*Physicians, Family/ (10285)
- 4 exp \*Family Practice/ or \*"Ambulatory Care"/ (56144)
- 5 1 or 2 or 3 or 4 (239479)
- 6 ((reason\* or why or causes or common or complaints or conditions or diseases or disorders or problems) adj2 (attend\* or present\* or visit\* or consult\* or using)).ti,ab. (65952)
- 7 (Statistics & Numerical Data or Utilization).fs. or utiliz\*.ti,ab. [mp=title, abstract, original title, name of substance word, subject heading word, keyword heading word, protocol supplementary concept word, rare disease supplementary concept word, unique identifier] (1032867)
- 8 5 and 6 and 7 (998)
- 9 ((common or prevalent or frequent\*) adj1 (diagnoses or complaints or conditions or diseases or disorders or problems)).ti. (1110)
- 10 5 and 9 (82)
- 11 National Ambulatory Medical Care Survey.ti. or (Poseidon study not marrow).ti,ab. [mp=title, abstract, original title, name of substance word, subject heading word, keyword heading word, protocol supplementary concept word, rare disease supplementary concept word, unique identifier] (139)
- 12 ((reason\* or why or cause or causes or common or complaint\* or condition or conditions or disease\* or disorder\* or problem\*) adj2 (attend\* or visit\* or consult\* or see) adj2 (doctor\* or physician\*)).ti. (15)
- 13 8 or 10 or 11 or 12 (1222)
- 14 remove duplicates from 13 (1201)

## EMBASE

Database: Embase <1974 to 2016 January 25>

Search Strategy:

- 1 (office visit\* or primary care or primary health care or family medicine or family doctor\* or family physician\* or family practice\* or medical office or medical clinic).ti,ab. (151133)
- 2 exp primary health care/ or exp primary medical care/ or exp general practice/ or exp family medicine/ (189802)
- 3 \*general practitioner/ (16704)
- 4 \*"Ambulatory Care"/ (12167)
- 5 1 or 2 or 3 or 4 (267141)
- 6 ((reason\* or why or cause or causes or common or complaint\* or condition or conditions or disease\* or disorder\* or problem\*) adj2 (attend\* or present\* or visit\* or consult\* or using)).ti,ab. (169419)
- 7 health care utilization/ or exp statistics/ or "utilization review"/ or utiliz\*.ti,ab. [mp=title, abstract, heading word, drug trade name, original title, device manufacturer, drug manufacturer, device trade name, keyword] (868029)
- 8 5 and 6 and 7 (725)
- 9 ((common or prevalent or frequent\*) adj1 (diagnoses or complaints or conditions or diseases or disorders or problems)).ti. (1277)
- 10 5 and 9 (90)
- 11 National Ambulatory Medical Care Survey.ti. or (Poseidon study not marrow).ti,ab. [mp=title, abstract, heading word, drug trade name, original title, device manufacturer, drug manufacturer, device trade name, keyword] (165)
- 12 ((reason\* or why or cause or causes or common or complaint\* or condition or conditions or disease\* or disorder\* or problem\*) adj3 (attend\* or visit\* or consult\* or see) adj3 (doctor\* or physician\*)).ti. (46)
- 13 8 or 10 or 11 or 12 (1010)

## EBM Reviews

Database: EBM Reviews - Cochrane Database of Systematic Reviews <2005 to January 13, 2016>, EBM Reviews - ACP Journal Club <1991 to December 2015>, EBM Reviews - Database of Abstracts of Reviews of Effects <2nd Quarter 2015>, EBM Reviews - Cochrane Central Register of Controlled Trials <December 2015>, EBM Reviews - Cochrane Methodology Register <3<sup>rd</sup> Quarter 2012>, EBM Reviews - Health Technology Assessment <4th Quarter 2015>, EBM Reviews - NHS Economic Evaluation Database <2nd Quarter 2015>

Search Strategy:

- 1 (office visit\* or general practi\* or primary care or primary health care or family medicine or family doctor\* or family physician\* or family practice\* or medical office or medical clinic or primary medical care).ti,ab. (15600)
- 2 exp \*Primary Health Care/ or \*"Office Visits"/ (1154)
- 3 exp \*Physicians, Family/ (1)
- 4 exp \*Family Practice/ or \*"Ambulatory Care"/ (2)
- 5 1 or 2 or 3 or 4 (15818)
- 6 ((reason\* or why or causes or common or complaints or conditions or diseases or disorders

or problems) adj2 (attend\* or present\* or visit\* or consult\* or using)).ti,ab. (1826)  
7 (Statistics & Numerical Data or Utilization).fs. or utiliz\*.ti,ab. [mp=ti, ab, tx, kw, ct, ot, sh, hw] (14103)  
8 5 and 6 and 7 (12)  
9 ((common or prevalent or frequent\*) adj1 (diagnoses or complaints or conditions or diseases or disorders or problems)).ti. (23)  
10 5 and 9 (8)  
11 National Ambulatory Medical Care Survey.ti. or (Poseidon study not marrow).ti,ab. [mp=ti, ab, tx, kw, ct, ot, sh, hw] (1)  
12 ((reason\* or why or cause or causes or common or complaint\* or condition or conditions or disease\* or disorder\* or problem\*) adj2 (attend\* or visit\* or consult\* or see) adj2 (doctor\* or physician\*)).ti. (1)  
13 8 or 10 or 11 or 12 (21)

## CINAHL Searched January 26, 2016

| <input type="checkbox"/> Select / deselect all <input type="button" value="Search with AND"/> <input type="button" value="Search with OR"/> <input type="button" value="Delete Searches"/> |                                                                                                                                                                                                                                         |                                         |                                        |  |
|--------------------------------------------------------------------------------------------------------------------------------------------------------------------------------------------|-----------------------------------------------------------------------------------------------------------------------------------------------------------------------------------------------------------------------------------------|-----------------------------------------|----------------------------------------|--|
| Search ID#                                                                                                                                                                                 | Search Terms                                                                                                                                                                                                                            | Search Options                          | Actions                                |  |
| <input type="checkbox"/> S15                                                                                                                                                               | (S10 OR S11 OR S13) AND (S9 AND S14)                                                                                                                                                                                                    | Search modes - Find all my search terms | <a href="#">View Results</a> (264)     |  |
| <input type="checkbox"/> S14                                                                                                                                                               | S10 OR S11 OR S13                                                                                                                                                                                                                       | Search modes - Find all my search terms | <a href="#">View Results</a> (2,028)   |  |
| <input type="checkbox"/> S13                                                                                                                                                               | ((reason* or why or cause or causes or common or complaint* or condition or conditions or disease* or disorder* or problem*) N2 (attend* or visit* or consult* or see) N2 (doctor* or physician*))                                      | Search modes - Find all my search terms | <a href="#">View Results</a> (130)     |  |
| <input type="checkbox"/> S12                                                                                                                                                               | "Poseidon study" NOT marrow                                                                                                                                                                                                             | Search modes - Find all my search terms | <a href="#">View Results</a> (0)       |  |
| <input type="checkbox"/> S11                                                                                                                                                               | National Ambulatory Medical Care Survey                                                                                                                                                                                                 | Search modes - Find all my search terms | <a href="#">View Results</a> (610)     |  |
| <input type="checkbox"/> S10                                                                                                                                                               | T1 ((reason* or why or causes or common or complaints or conditions or diseases or disorders or problems) N2 (attend* or present* or visit* or consult* or using))                                                                      | Search modes - Find all my search terms | <a href="#">View Results</a> (1,305)   |  |
| <input type="checkbox"/> S9                                                                                                                                                                | S2 OR S3 OR S4 OR S5 OR S6 OR S8                                                                                                                                                                                                        | Search modes - Find all my search terms | <a href="#">View Results</a> (26,930)  |  |
| <input type="checkbox"/> S8                                                                                                                                                                | S1 AND S7                                                                                                                                                                                                                               | Search modes - Find all my search terms | <a href="#">View Results</a> (26,122)  |  |
| <input type="checkbox"/> S7                                                                                                                                                                | utiliz* or statistic*                                                                                                                                                                                                                   | Search modes - Find all my search terms | <a href="#">View Results</a> (759,983) |  |
| <input type="checkbox"/> S6                                                                                                                                                                | (MH "Office Visits/UT/SN")                                                                                                                                                                                                              | Search modes - Find all my search terms | <a href="#">View Results</a> (493)     |  |
| <input type="checkbox"/> S5                                                                                                                                                                | (MH "Ambulatory Care/UT/SN")                                                                                                                                                                                                            | Search modes - Find all my search terms | <a href="#">View Results</a> (911)     |  |
| <input type="checkbox"/> S4                                                                                                                                                                | (MH "Family Practice/UT/SN")                                                                                                                                                                                                            | Search modes - Find all my search terms | <a href="#">View Results</a> (939)     |  |
| <input type="checkbox"/> S3                                                                                                                                                                | (MH "Physicians, Family/UT/SN")                                                                                                                                                                                                         | Search modes - Find all my search terms | <a href="#">View Results</a> (519)     |  |
| <input type="checkbox"/> S2                                                                                                                                                                | (MH "Primary Health Care/SN/UT")                                                                                                                                                                                                        | Search modes - Find all my search terms | <a href="#">View Results</a> (1,735)   |  |
| <input type="checkbox"/> S1                                                                                                                                                                | "office visit*" or "general practi*" or "primary care" or "primary health care" or "family medicine" or "family doctor*" or "family physician*" or "family practice*" or "medical office" or "medical clinic" or "primary medical care" | Search modes - Find all my search terms | <a href="#">View Results</a> (95,630)  |  |

## Sociological Abstracts

ti(reason\* OR why OR cause OR causes OR common OR complaint\* OR condition OR conditions OR disease\* OR disorder\* OR problem) AND ti(attend\* OR present\* OR visit\* OR consult\* OR see OR utiliz\*) AND ("primary care" OR "primary health care" OR "family physician" OR "family practi\*" OR "family doctor\*" OR "general practi\*" OR "medical clinic\*" OR "office visits" OR "primary medical care") = 22

**SCOPUS**

(TITLE("primary care" OR "primary health care" OR "family physician" OR "family practi\*" OR "family doctor\*" OR "general practi\*" OR "medical clinic\*" OR "office visits" OR "primary medical care")) and (TITLE(attend\* OR present\* OR visit\* OR consult\* OR see OR utiliz\*)) and (TITLE(reason\* OR why OR cause OR causes OR common OR complaint\* OR condition OR conditions OR disease\* OR disorder\* OR problem\*))

**Google** (Searched January 21, 2016)

(reasons or causes) (visit\* or attend\*) (doctor\* or physician\* or "primary care")

**Supplement 2. Diagnostic coding legend for general conditions.**

| <b>General Diagnostic Code Given for Systematic Review</b> | <b>Diagnostic Codes Used in Individual Studies</b>                                                                                                             |
|------------------------------------------------------------|----------------------------------------------------------------------------------------------------------------------------------------------------------------|
| <b>Blood/blood-forming organs</b>                          | blood, blood forming organs and immune system<br>blood, blood forming organs and immune mechanism<br>blood<br>blood/blood-forming organs                       |
| <b>Breast</b>                                              | breast                                                                                                                                                         |
| <b>Cancer</b>                                              | cancer<br>cancers/neoplasms<br>neoplasm                                                                                                                        |
| <b>Cardiovascular/circulatory</b>                          | cardiovascular/circulatory<br>cardiovascular<br>circulatory systems<br>circulatory                                                                             |
| <b>Nervous system/sense organs</b>                         | central nervous system<br>nervous system/sense organs<br>nervous system and sense organs<br>neurological<br>ear<br>eye                                         |
| <b>Congenital</b>                                          | congenital                                                                                                                                                     |
| <b>Dental</b>                                              | dental                                                                                                                                                         |
| <b>Digestive</b>                                           | digestive<br>gastrointestinal<br>digestive system                                                                                                              |
| <b>Endocrine</b>                                           | endocrine, nutritional, metabolic diseases<br>immunity disorders<br>endocrine, metabolic, nutritional<br>endocrine<br>endocrine/nutritional/metabolic/immunity |
| <b>General/unspecified</b>                                 | general and unspecified<br>general unspecified<br>general                                                                                                      |

|                                 |                                                                                                                                                         |
|---------------------------------|---------------------------------------------------------------------------------------------------------------------------------------------------------|
|                                 | unspecified conditions<br>all other diagnosis/unknown<br>symptoms, signs, and ill-defined conditions<br>symptoms non-specific                           |
| <b>Hepatic</b>                  | hepatic                                                                                                                                                 |
| <b>Infectious/parasitic</b>     | infectious and parasitic diseases<br>infectious/parasitic                                                                                               |
| <b>Injury/poisoning</b>         | injury/poisoning<br>injury and poisoning                                                                                                                |
| <b>Psychological</b>            | mental disorders<br>psychological<br>mental                                                                                                             |
| <b>Musculoskeletal</b>          | musculoskeletal<br>musculoskeletal/connective tissue<br>musculoskeletal and connective tissue<br>muscular                                               |
| <b>Pregnancy/perinatal</b>      | pregnancy, child bearing, family planning<br>pregnancy/childbirth/puerperium<br>perinatal                                                               |
| <b>Genitourinary</b>            | urological<br>urinary<br>urinary tract<br>genito-urinary<br>genitourinary<br>genital tract<br>gynaecology/infertility<br>male genital<br>female genital |
| <b>Renal</b>                    | renal                                                                                                                                                   |
| <b>Respiratory</b>              | respiratory<br>respiratory system                                                                                                                       |
| <b>Skin/subcutaneous tissue</b> | skin<br>skin/subcutaneous tissue<br>skin and subcutaneous tissue                                                                                        |
| <b>Social problems</b>          | social                                                                                                                                                  |

|                                     |                                                                                                                                                                                                                                                                                                                 |
|-------------------------------------|-----------------------------------------------------------------------------------------------------------------------------------------------------------------------------------------------------------------------------------------------------------------------------------------------------------------|
|                                     | social problems                                                                                                                                                                                                                                                                                                 |
| <b>Supplementary classification</b> | actions (“therapeutic procedures”, “preventive procedures”, “operations”, “administration”)<br>supplementary classification (ICD-9 - “Factors Influencing Health Status and Contact with Health Services”)<br>check-up<br>investigations (“examination”, “history”, “diagnostic procedures/lab test/radiology”) |
| <b>Vaccines</b>                     | vaccines                                                                                                                                                                                                                                                                                                        |



**Supplement 3. Diagnostic coding legend for specific conditions.**

| <b>Specific Diagnostic Code Given for Systematic Review</b> | <b>Diagnostic Codes Used in Individual Studies</b>                                                                                                                                                                                                                                                                                     |
|-------------------------------------------------------------|----------------------------------------------------------------------------------------------------------------------------------------------------------------------------------------------------------------------------------------------------------------------------------------------------------------------------------------|
| <b>Abdominal unspecified</b>                                | Gastroenteritis/diarrhea<br>Stomach pain, cramps<br>Pain in the abdomen<br>Intestines and peritoneum disease other<br>Gastroenteritis<br>Intestinal infectious disease<br>Other localized abdominal pain<br>Abdominal pain/cramps general<br>Abdominal pain epigastric<br>Diarrhoea<br>Vomiting<br>Nausea<br>Abdominal complain/cramps |
| <b>Acute MSK injury</b>                                     | Sprains strains joints and adjacent muscles                                                                                                                                                                                                                                                                                            |
| <b>Acute otitis media</b>                                   | Ear and mastoid process diseases<br>Otitis media<br>Acute sup. otitis media<br>Earache or ear infection<br>Acute otitis media<br>Ear pain/earache                                                                                                                                                                                      |
| <b>Admin</b>                                                | Administrative procedure                                                                                                                                                                                                                                                                                                               |
| <b>Administrative medical</b>                               | Physical for school or employment                                                                                                                                                                                                                                                                                                      |
| <b>Anemia</b>                                               | Anaemias<br>Anaemia                                                                                                                                                                                                                                                                                                                    |
| <b>Arthritis (not back)</b>                                 | Rheumatism excluding the back<br>Arthritis<br>Arthropathies and related disorders<br>Pain in joint<br>Osteoarthritis<br>Arthritis/joint Swelling<br>Knee symptoms<br>Degenerative joint disease<br>Knee symptoms/complaints<br>Joint pain or symptoms<br>Hand and finger pain or symptom                                               |
| <b>Asthma</b>                                               | Asthma                                                                                                                                                                                                                                                                                                                                 |
| <b>Back pain/spinal pain</b>                                | Back complaint<br>Dorsopathies<br>Back symptoms                                                                                                                                                                                                                                                                                        |

|                                 |                                                                                                                                                                                                                                                                        |
|---------------------------------|------------------------------------------------------------------------------------------------------------------------------------------------------------------------------------------------------------------------------------------------------------------------|
|                                 | Dorsalgia<br>Low back symptoms<br>Low back complaint excl radiation<br>Neck pain<br>Neck symptom/neck complaint excl headache<br>Shoulder symptoms/complaints<br>Shoulder pain or symptom                                                                              |
| <b>Bronchitis/bronchiolitis</b> | Bronchitis<br>Bronchiolitis<br>Acute bronchitis/bronchiolitis                                                                                                                                                                                                          |
| <b>Cardiovascular</b>           | Ischaemic heart diseases<br>Congestive heart failure<br>Stroke/cerebrovascular accidents<br>Coronary artery disease<br>Chest pain and related symptoms<br>Veins, lymphatic, and other circulatory diseases<br>Pressure/tightness of heart<br>Chest symptoms/complaints |
| <b>Cellulitis</b>               | Skin and subcutaneous tissue infections<br>Nonfungal skin infection                                                                                                                                                                                                    |
| <b>COPD</b>                     | Obstructive airway diseases<br>Pulmonary disease chronic obstructive and allied conditions                                                                                                                                                                             |
| <b>Cough</b>                    | Coughing<br>Cough                                                                                                                                                                                                                                                      |
| <b>Depression/anxiety</b>       | Depression or anxiety<br>Depression<br>Anxiety<br>Anxiety and nervousness<br>Neurotic personality and other mental disorders<br>Psychological disturbances<br>Counselling<br>Feeling anxious/nervous/tense                                                             |
| <b>Dermatitis</b>               | Contact dermatitis<br>Skin and subcutaneous tissues other inflammatory conditions<br>Skin itch/eczema<br>Skin rash<br>Eczema<br>Pruritus<br>Rash generalized<br>Local redness/erythema/rash                                                                            |
| <b>Diabetes</b>                 | Type 2 diabetes                                                                                                                                                                                                                                                        |

|                                 |                                                                                                                                                                                       |
|---------------------------------|---------------------------------------------------------------------------------------------------------------------------------------------------------------------------------------|
|                                 | Diabetes mellitus<br>Diabetes                                                                                                                                                         |
| <b>Dyspepsia</b>                | Gastro-esophageal reflux disease<br>Peptic disease<br>Dyspepsia/ulcers<br>Esophagus stomach duodenal disease                                                                          |
| <b>Epilepsy</b>                 | Epilepsy                                                                                                                                                                              |
| <b>Eye</b>                      | Eye and adnexa disorders<br>Red eye<br>Eye pain                                                                                                                                       |
| <b>Fatigue</b>                  | Malaise and fatigue<br>General weakness/tiredness                                                                                                                                     |
| <b>Fever</b>                    | Fever                                                                                                                                                                                 |
| <b>Gynecology</b>               | Genital disease, other<br>Female genital tract disorders, other<br>Vaginal discharge                                                                                                  |
| <b>Headache</b>                 | Headache, pain in head<br>Headache                                                                                                                                                    |
| <b>Hepatitis</b>                | Hepatitis                                                                                                                                                                             |
| <b>HIV</b>                      | HIV/AIDS                                                                                                                                                                              |
| <b>Hypertension</b>             | Hypertension<br>Hypertension/high blood pressure<br>Essential hypertension<br>Hypertensive disease<br>Blood pressure test<br>Hypertension, complicated<br>Hypertension, uncomplicated |
| <b>Hypothyroidism/endocrine</b> | Hypothyroidism<br>Endocrine gland disease, other                                                                                                                                      |
| <b>Immunization</b>             | Immunization/vaccination                                                                                                                                                              |
| <b>Impacted cerumen</b>         | Impacted cerumen<br>Hearing complaints excl H84                                                                                                                                       |
| <b>Infection unspecified</b>    | Virosis<br>Infectious disease, other<br>Mycoses                                                                                                                                       |
| <b>Influenza</b>                | Influenza                                                                                                                                                                             |
| <b>Leg symptoms</b>             | Leg symptoms<br>Leg/thigh symptoms/complaints<br>Foot and toe symptoms/complaints                                                                                                     |
| <b>Lipid</b>                    | Lipid Disorder<br>Hyperlipidemia<br>Obesity/lipid disorders                                                                                                                           |

|                                     |                                                                                                                                                                                 |
|-------------------------------------|---------------------------------------------------------------------------------------------------------------------------------------------------------------------------------|
|                                     | Dyslipidemia                                                                                                                                                                    |
| <b>Medication</b>                   | Medication<br>Prescription                                                                                                                                                      |
| <b>Metabolic immunity disorders</b> | Metabolic immunity disorders                                                                                                                                                    |
| <b>Myalgia</b>                      | Myalgia<br>Muscle pain                                                                                                                                                          |
| <b>Nutritional deficiency</b>       | Vitamin/nutritional deficiency                                                                                                                                                  |
| <b>Pain not specified</b>           | Generalised body pain<br>Pain, not specified<br>Generalized aches and pains                                                                                                     |
| <b>Parasites</b>                    | Helminthiasis<br>Worms, other parasites<br>Scabies and other acariases                                                                                                          |
| <b>Pharyngitis</b>                  | Throat symptoms<br>Acute sore throat<br>Pharyngitis<br>Symptom/complaint throat<br>Swallowing problems                                                                          |
| <b>Pneumonia</b>                    | Lower respiratory tract infections/pneumonia<br>Lower respiratory infection<br>Pneumonia<br>Acute lower respiratory infection<br>Resp infection other                           |
| <b>Pregnancy</b>                    | Pregnancy-related                                                                                                                                                               |
| <b>Progress visit</b>               | Progress visit                                                                                                                                                                  |
| <b>Respiratory unspecified</b>      | Pain in respiratory system<br>Shortness of breath/dyspnea<br>Respiratory/pleuritic pain                                                                                         |
| <b>Routine health maintenance</b>   | Health maintenance and prevention<br>General medical examination<br>Check up<br>Routine health maintenance<br>Well-baby examination<br>Observation/health education/advice/diet |
| <b>Sinusitis</b>                    | Sinusitis<br>Sinus problems<br>Rhinitis<br>Sneezing/nasal congestion                                                                                                            |
| <b>Skin unspecified</b>             | Skin lesion, not specified<br>Skin and subcutaneous tissue diseases other<br>Local swelling/papule/lump/mass<br>Skin symptom/complaint, other                                   |
| <b>Sleep disturbance</b>            | Sleep disturbance                                                                                                                                                               |

|                                                       |                                                                                                                                                                                                                                                                    |
|-------------------------------------------------------|--------------------------------------------------------------------------------------------------------------------------------------------------------------------------------------------------------------------------------------------------------------------|
| <b>Social problems</b>                                | Social problems                                                                                                                                                                                                                                                    |
| <b>Symptoms unspecified</b>                           | Symptoms, signs and illdefined<br>Feeling ill<br>Loss of appetite<br>Other referrals not elsewhere classified<br>Weight loss                                                                                                                                       |
| <b>Tuberculosis</b>                                   | TB<br>Tuberculosis                                                                                                                                                                                                                                                 |
| <b>Test follow-up</b>                                 | Other and unspecified test results<br>Test results<br>Blood test                                                                                                                                                                                                   |
| <b>Tonsillitis</b>                                    | Acute tonsillitis<br>Recurrent tonsillitis                                                                                                                                                                                                                         |
| <b>Upper respiratory tract infection, unspecified</b> | Common cold, rhinosinusitis<br>Acute upper respiratory infection<br>Upper respiratory infection<br>Upper respiratory tract infections<br>Upper respiratory tract infection<br>URTI acute<br>Upper respiratory tract diseases other<br>Respiratory infections acute |
| <b>Urinary tract infection</b>                        | Urinary tract infection<br>Cystitis<br>Urinary system diseases, other<br>Acute cystitis<br>Recurrent UTI<br>Acute urethritis<br>Pyelonephritis<br>Fungal UTI<br>Catheter-associated UTI<br>Urinary frequency/urgency<br>Dysuria/painful urination<br>Dysuria       |
| <b>Vertigo/dizziness</b>                              | Vertigo/dizziness                                                                                                                                                                                                                                                  |

## Supplement 4. Characteristics of included studies.

| Citation                                    | Years of data collection                                | Total sampling duration (number of weeks)                 | Country                  | Specific area    | Total patient population served                     | Total number of visits included                         | General system (SY) or specific (DX) | Patient reported (PT) or clinician reported (DR) | Name of coding system used | Results as number (N), percent (P), or rate (R)      | Quality Score (out of 5) |
|---------------------------------------------|---------------------------------------------------------|-----------------------------------------------------------|--------------------------|------------------|-----------------------------------------------------|---------------------------------------------------------|--------------------------------------|--------------------------------------------------|----------------------------|------------------------------------------------------|--------------------------|
| Binns, 2007                                 | 2002                                                    | 32 (continuous)                                           | USA                      | national         | N/A                                                 | 597,176                                                 | SY, DX                               | DR                                               | ICD-9-CM, PRINS            | P                                                    | 4                        |
| Britt, 1996                                 | 1990-1991                                               | 2 (per physician, over 12 months)                         | Australia                | national         | N/A                                                 | 113,468                                                 | SY                                   | PT, DR                                           | ICPC                       | R                                                    | 5                        |
| Britt, 2015                                 | 2014-2015                                               | n/a (up to 100 encounters)                                | Australia                | national         | N/A                                                 | 98,728                                                  | DX                                   | PT, DR                                           | ICPC-2                     | N, P, R                                              | 5                        |
| Brueton, 2010                               | 2001-2002                                               | 26                                                        | South Africa             | Eastern Cape     | 250,000                                             | 4,383                                                   | SY, DX                               | PT, DR                                           | ICPC-2                     | N, P                                                 | 3                        |
| Fleming, 2005                               | 2001                                                    | 52 (continuous)                                           | England, Wales           | national         | 325,850                                             | N/A                                                     | DX                                   | DR                                               | ICD-9                      | R                                                    | 3                        |
| Harrison, 2011                              | 2009-2010                                               | n/a (up to 100 encounters)                                | Australia                | national         | N/A                                                 | 101,349                                                 | SY                                   | PT, DR                                           | ICPC-2                     | R                                                    | 5                        |
| Mash, 2012                                  | 2010                                                    | 1 (5 days over 1 year)                                    | South Africa             | national         | 2,780,270                                           | 18,856                                                  | SY, DX                               | PT, DR                                           | ICPC-2                     | N, P                                                 | 4                        |
| Ministry of Health, 2004                    | 2001-2002                                               | 2 (per physician, over 18 months)                         | New Zealand              | national         | N/A                                                 | 8258                                                    | SY                                   | PT, DR                                           | READ2                      | P (not practice subgroups), R (not season subgroups) | 5                        |
| Mohan, 2003                                 | 2000                                                    | 52 (continuous)                                           | India                    | Mysore           | N/A                                                 | N/A                                                     | DX                                   | DR                                               | N/A                        | P                                                    | 1                        |
| Murphy, 2015                                | 2008-2010                                               | n/a (up to 100 encounters)                                | Ireland                  | national         | 503,823                                             | 16,899                                                  | SY                                   | PT                                               | N/A                        | N, P (not subgroups)                                 | 3                        |
| National Center for Health Statistics, 2014 | 2014                                                    | 52 (1 week per physician)                                 | USA                      | national         | N/A                                                 | 6,386                                                   | DX                                   | DR                                               | ICD-9-CM                   | N, P                                                 | 5                        |
| Pace, 2004                                  | 1995-1998                                               | 208 (continuous)                                          | USA                      | national         | N/A                                                 | 13,149                                                  | DX                                   | DR                                               | ICD-9                      | N (not subgroups), P                                 | 5                        |
| Pearson, 1996                               | 1994-1995                                               | 52 (continuous)                                           | England                  | Somerset         | 65,000                                              | 4,685                                                   | SY                                   | DR                                               | ICD-9                      | R                                                    | 5                        |
| Probst, 2002                                | 1996-1997                                               | 104 (continuous)                                          | USA                      | national         | N/A                                                 | 19,409                                                  | DX                                   | PT                                               | ICD-10                     | P                                                    | 5                        |
| Salvi, 2015                                 | 2011                                                    | 1 day                                                     | India                    | national         | N/A                                                 | 204,912                                                 | DX                                   | DR                                               |                            | P                                                    | 2                        |
| Sayer, 1996                                 | 1990-1991                                               | 2 (per physician, over 12 months)                         | Australia                | national         | N/A                                                 | 96,144                                                  | SY                                   | PT, DR                                           | ICPC                       | N                                                    | 5                        |
| Soler, 2012                                 | 1995-2005 (Amsterdam), 2001-2005 (Malta), 2003 (Serbia) | 132 (Amsterdam), 60 (Malta), 12 (Serbia) (all continuous) | Amsterdam, Malta, Serbia | national         | 15,318 (Netherlands), 9896 (Malta), 72,673 (Serbia) | 838,896 (Netherlands), 70,177 (Malta), 207,323 (Serbia) | DX                                   | PT                                               | ICPC, ICPC-2               | R                                                    | 4                        |
| Wandell, 2013                               | 2009-2011                                               | 104 (continuous)                                          | Sweden                   | Stockholm County | 1,987,827                                           | 3,810,843                                               | DX                                   | DR                                               | ICD-10                     | N, P                                                 | 1                        |

## Supplement 5. Quality assessment of included studies.

|                                                    | Low quality |    | High quality |
|----------------------------------------------------|-------------|----|--------------|
| Representative sample of clinicians*               | 7           |    | 11           |
| Representative sample of patients†                 | 1           | 17 |              |
| Used a defined coding system                       | 3           | 15 |              |
| Prolonged data collection (≥1 year)                | 4           |    | 14           |
| Data collected prospectively (vs. retrospectively) | 3           | 15 |              |

\*Considered a representative sample of clinicians if there was evidence for at least 2/3 of the following: mixture of male/female clinicians, mixture of years in practice, mixture of practice sizes.

†Considered a representative sample of patients if there was evidence for at least 2/3 of the following: mixture of male/female patients, mixture of urban/rural, range in patient age.

| Citation                                    | Representative sample of clinicians | Representative sample of patients | Defined coding | Prolonged data collection | Retrospective or prospective | Total score |
|---------------------------------------------|-------------------------------------|-----------------------------------|----------------|---------------------------|------------------------------|-------------|
| Binns, 2007                                 | 1                                   | 1                                 | 1              | 0                         | 1                            | 4           |
| Britt, 1996                                 | 1                                   | 1                                 | 1              | 1                         | 1                            | 5           |
| Britt, 2015                                 | 1                                   | 1                                 | 1              | 1                         | 1                            | 5           |
| Brueton, 2010                               | 0                                   | 1                                 | 1              | 0                         | 1                            | 3           |
| Fleming, 2005                               | 0                                   | 1                                 | 1              | 1                         | 0                            | 3           |
| Harrison, 2011                              | 1                                   | 1                                 | 1              | 1                         | 1                            | 5           |
| Mash, 2012                                  | 0                                   | 1                                 | 1              | 1                         | 1                            | 4           |
| Ministry of Health, 2004                    | 1                                   | 1                                 | 1              | 1                         | 1                            | 5           |
| Mohan, 2003                                 | 0                                   | 0                                 | 0              | 1                         | 0                            | 1           |
| Murphy, 2015                                | 0                                   | 1                                 | 0              | 1                         | 1                            | 3           |
| National Center for Health Statistics, 2014 | 1                                   | 1                                 | 1              | 1                         | 1                            | 5           |
| Pace, 2004                                  | 1                                   | 1                                 | 1              | 1                         | 1                            | 5           |
| Pearson, 1996                               | 1                                   | 1                                 | 1              | 1                         | 1                            | 5           |
| Probst, 2002                                | 1                                   | 1                                 | 1              | 1                         | 1                            | 5           |
| Salvi, 2015                                 | 0                                   | 1                                 | 0              | 0                         | 1                            | 2           |
| Sayer, 1996                                 | 1                                   | 1                                 | 1              | 1                         | 1                            | 5           |
| Soler, 2012                                 | 0                                   | 1                                 | 1              | 1                         | 1                            | 4           |
| Wandell, 2013                               | 1                                   | 1                                 | 1              | 1                         | 0                            | 4           |

**Supplement 6. Proportion of reasons for visits and problems managed.**

|                     |                         |                           |                         |                        |                         |
|---------------------|-------------------------|---------------------------|-------------------------|------------------------|-------------------------|
| Reasons for visits  | Top 3<br>(Britt, 2015)  | Top 20<br>(Probst, 2002)  | Top 30<br>(Britt, 2015) | Top 80<br>(Mash, 2012) |                         |
| Percent of visits   | 23%                     | 46%                       | 59%                     | 83%                    |                         |
|                     |                         |                           |                         |                        |                         |
| Problems managed    | Top 10<br>(Britt, 2015) | Top 10<br>(Brueton, 2010) | Top 23<br>(Pace, 2004)  | Top 25<br>(Mash, 2012) | Top 35<br>(Britt, 2015) |
| Percent of problems | 29%                     | 52%                       | 76%                     | 53%                    | 54%                     |



## Supplement 7. Subgroup data.

### S7a. Seasonality subgroups

|    | New Zealand – General (Ministry of Health, 2004) |                              |                              |                              | United States of America – Specific (Pace, 2004) |                                                |                                                |                                                |
|----|--------------------------------------------------|------------------------------|------------------------------|------------------------------|--------------------------------------------------|------------------------------------------------|------------------------------------------------|------------------------------------------------|
|    | Autumn                                           | Winter                       | Spring                       | Summer                       | Autumn                                           | Winter                                         | Spring                                         | Summer                                         |
| 1  | Supplementary classification                     | Respiratory                  | Supplementary classification | Supplementary classification | Hypertension                                     | Upper respiratory tract infection, unspecified | Upper respiratory tract infection, unspecified | Hypertension                                   |
| 2  | Respiratory                                      | Supplementary classification | Respiratory                  | Respiratory                  | Upper respiratory tract infection, unspecified   | Hypertension                                   | Hypertension                                   | Routine Health Maintenance                     |
| 3  | Cardiovascular/ circulatory                      | Cardiovascular/ circulatory  | Cardiovascular/ circulatory  | Cardiovascular/ circulatory  | Routine Health Maintenance                       | Routine Health Maintenance                     | Sinusitis                                      | Diabetes                                       |
| 4  | Nervous/ sense organs                            | Nervous/ sense organs        | Nervous/ sense organs        | Skin/ subcutaneous tissue    | Sinusitis                                        | Sinusitis                                      | Routine Health Maintenance                     | Lipid                                          |
| 5  | Injury/ poisoning                                | Injury/ poisoning            | Injury/ poisoning            | Nervous/ sense organs        | Diabetes                                         | Bronchitis/ bronchiolitis                      | Bronchitis/ bronchiolitis                      | Upper respiratory tract infection, unspecified |
| 6  | Skin/ subcutaneous tissue                        | Skin/ subcutaneous tissue    | Musculoskeletal              | Injury/ poisoning            | Lipid                                            | Asthma                                         | Diabetes                                       | Sinusitis                                      |
| 7  | General/ unspecified                             | Psychological                | Skin/ subcutaneous tissue    | General/ unspecified         | Bronchitis/ bronchiolitis                        | Acute otitis media                             | Lipid                                          | Back pain/spinal pain                          |
| 8  | Musculoskeletal                                  | Endocrine                    | General/ unspecified         | Musculoskeletal              | Arthritis (not back)                             | Diabetes                                       | Back pain/spinal pain                          | Depression/ anxiety                            |
| 9  | Psychological                                    | Musculoskeletal              | Digestive                    | Psychological                | Back pain/spinal pain                            | Depression/ anxiety                            | Depression/ anxiety                            | Arthritis (not back)                           |
| 10 | Digestive                                        | Genitourinary                | Genitourinary                | Genitourinary                | Depression/ anxiety                              | Arthritis (not back)                           | Arthritis (not back)                           | Asthma                                         |
| 11 | Genitourinary                                    | General/ unspecified         | Infectious/ parasitic        | Infectious/ parasitic        | Asthma                                           | Lipid                                          | Asthma                                         | Bronchitis/ bronchiolitis                      |
| 12 | Endocrine                                        | Infectious/ parasitic        | Psychological                | Digestive                    | Acute otitis media                               | Back pain/spinal pain                          | Acute otitis media                             | Urinary tract infection                        |
| 13 | Infectious/ parasitic                            | Digestive                    | Endocrine                    | Endocrine                    | Pregnancy                                        | Pregnancy                                      | Urinary tract infection                        | Pregnancy                                      |
| 14 | Cancer                                           | Cancer                       | Cancer                       | Cancer                       | Headache                                         | Headache                                       | Dermatitis                                     | Cardiovascular                                 |
| 15 | Blood/ blood-forming organs                      | Blood/ blood-forming organs  | Blood/ blood-forming organs  | Blood/ blood-forming organs  | Urinary tract infection                          | Urinary tract infection                        | Headache                                       | Acute otitis media                             |
| 16 | Pregnancy/ perinatal                             | Pregnancy/ perinatal         | Pregnancy/ perinatal         | Pregnancy/ perinatal         | Cardiovascular                                   | Cardiovascular                                 | COPD                                           | COPD                                           |
| 17 | Congenital                                       | Congenital                   | Congenital                   | Congenital                   | COPD                                             | COPD                                           | Hypothyroid                                    | Dermatitis                                     |
| 18 |                                                  |                              |                              |                              | Dermatitis                                       | Dermatitis                                     | Pregnancy                                      | Headache                                       |
| 19 |                                                  |                              |                              |                              | Hypothyroid                                      | Hypothyroid                                    | Cardiovascular                                 | Hypothyroid                                    |

### S7b. Clinician gender subgroups

|           | <b>Male Clinician – General</b>           | <b>Female Clinician – General</b>         |
|-----------|-------------------------------------------|-------------------------------------------|
|           | Australia (Britt, 1996 and Harrison 2011) | Australia (Britt, 1996 and Harrison 2011) |
| <b>1</b>  | Respiratory                               | Respiratory                               |
| <b>2</b>  | Musculoskeletal                           | Genitourinary                             |
| <b>3</b>  | Skin/subcutaneous tissue                  | Cardiovascular/circulatory                |
| <b>4</b>  | Cardiovascular/circulatory                | General/unspecified                       |
| <b>5</b>  | General/unspecified                       | Skin/subcutaneous tissue                  |
| <b>6</b>  | Nervous system/sense organs               | Musculoskeletal                           |
| <b>7</b>  | Digestive                                 | Nervous system/sense organs               |
| <b>8</b>  | Endocrine                                 | Digestive                                 |
| <b>9</b>  | Psychological                             | Psychological                             |
| <b>10</b> | Genitourinary                             | Endocrine                                 |
| <b>11</b> | Pregnancy/perinatal                       | Pregnancy/perinatal                       |
| <b>12</b> | Blood/blood-forming organs                | Blood/blood-forming organs                |
| <b>13</b> | Social problems                           | Social problems                           |

### S7c. Patient gender subgroups

|           | <b>Male Patient – General</b>                                                  | <b>Male Patient – Specific</b>                 | <b>Female Patient – General</b>                                                | <b>Female Patient – Specific</b>               |
|-----------|--------------------------------------------------------------------------------|------------------------------------------------|--------------------------------------------------------------------------------|------------------------------------------------|
|           | Ireland (Murphy, 2015),<br>England (Pearson, 1996),<br>Australia (Sayer, 1996) | England and Wales<br>(Fleming, 2005)           | Ireland (Murphy, 2015),<br>England (Pearson, 1996),<br>Australia (Sayer, 1996) | England and Wales<br>(Fleming, 2005)           |
| <b>1</b>  | Respiratory                                                                    | Symptoms unspecified                           | Respiratory                                                                    | Symptoms unspecified                           |
| <b>2</b>  | Skin/subcutaneous tissue                                                       | Upper respiratory tract infection, unspecified | Nervous system/sense organs                                                    | Upper respiratory tract infection, unspecified |
| <b>3</b>  | Musculoskeletal                                                                | Arthritis (not back)                           | Skin/subcutaneous tissue                                                       | Arthritis (not back)                           |
| <b>4</b>  | Digestive                                                                      | Acute otitis media                             | Musculoskeletal                                                                | Gynecology                                     |
| <b>5</b>  | Nervous system/sense organs                                                    | Dermatitis                                     | Cardiovascular/circulatory                                                     | Acute otitis media                             |
| <b>6</b>  | General/unspecified                                                            | Hypertension                                   | Genitourinary                                                                  | Skin unspecified                               |
| <b>7</b>  | Cardiovascular/circulatory                                                     | Back pain/spinal pain                          | Digestive                                                                      | Hypertension                                   |
| <b>8</b>  | Genitourinary                                                                  | Eye                                            | General/unspecified                                                            | Back pain/spinal pain                          |
| <b>9</b>  | Endocrine                                                                      | Skin unspecified                               | Endocrine                                                                      | Eye                                            |
| <b>10</b> | Psychological                                                                  | COPD                                           | Psychological                                                                  | Depression/anxiety                             |
| <b>11</b> | Supplementary classification                                                   | Depression/anxiety                             | Supplementary classification                                                   | Dermatitis                                     |
| <b>12</b> | Injury/poisoning                                                               | Cellulitis                                     | Blood/blood-forming organs                                                     | Urinary tract infection                        |
| <b>13</b> | Cancer                                                                         | Acute MSK injury                               | Cancer                                                                         | Abdominal unspecified                          |
| <b>14</b> | Infectious/parasitic                                                           | Infection unspecified                          | Injury/poisoning                                                               | COPD                                           |
| <b>15</b> | Blood/blood-forming organs                                                     | Gynecology                                     | Vaccines                                                                       | Cellulitis                                     |
| <b>16</b> | Vaccines                                                                       | Dyspepsia                                      | Breast                                                                         | Infection unspecified                          |
| <b>17</b> | Social problems                                                                | Cardiovascular                                 | Social problems                                                                | Acute MSK injury                               |
| <b>18</b> | Dental                                                                         | Endocrine/hypothyroidism                       | Dental                                                                         | Dyspepsia                                      |
| <b>19</b> | Renal                                                                          | Abdominal unspecified                          | Hepatic                                                                        | Cardiovascular                                 |
| <b>20</b> | Hepatic                                                                        | Metabolic immunity disorders other             | Pregnancy/perinatal                                                            | Cancer                                         |

#### S7d. Urban vs. rural subgroups

|           | United States of America – Specific (Probst, 2002) |                                                |
|-----------|----------------------------------------------------|------------------------------------------------|
|           | Urban                                              | Rural                                          |
| <b>1</b>  | Routine health maintenance                         | Routine health maintenance                     |
| <b>2</b>  | Cough                                              | Cough                                          |
| <b>3</b>  | Pharyngitis                                        | Hypertension                                   |
| <b>4</b>  | Hypertension                                       | Back pain/spinal pain                          |
| <b>5</b>  | Fever                                              | Progress visit                                 |
| <b>6</b>  | Progress visit                                     | Pharyngitis                                    |
| <b>7</b>  | Acute otitis media                                 | Dermatitis                                     |
| <b>8</b>  | Dermatitis                                         | Acute otitis media                             |
| <b>9</b>  | n/a*                                               | Administrative medical                         |
| <b>10</b> | Abdominal unspecified                              | Medication                                     |
| <b>11</b> | Upper respiratory tract infection, unspecified     | Arthritis (not back)                           |
| <b>12</b> | Back pain/spinal pain                              | Upper respiratory tract infection, unspecified |
| <b>13</b> | Headache                                           | Fever                                          |
| <b>14</b> | Cardiovascular                                     | Headache                                       |
| <b>15</b> | Administrative medical                             | Abdominal unspecified                          |
| <b>16</b> | Medication                                         | Cardiovascular                                 |
| <b>17</b> | Diabetes                                           | Diabetes                                       |
| <b>18</b> | n/a*                                               |                                                |
| <b>19</b> | n/a*                                               |                                                |
| <b>20</b> | Arthritis (not back)                               |                                                |

\*Not available - information in article was based on rural rankings and some urban conditions were not given.

**Supplement 8. Ranking of general categories of conditions presenting to primary care.**

| <b>Rank</b> | <b>Condition</b>                | <b>Rank Score*<br/>(maximum<br/>score 17)</b> | <b>Number of<br/>Studies<br/>Included in<br/>(out of 6)</b> | <b>Highest<br/>Rank</b> | <b>Lowest<br/>Rank</b> |
|-------------|---------------------------------|-----------------------------------------------|-------------------------------------------------------------|-------------------------|------------------------|
| <b>1</b>    | Respiratory                     | 16.8                                          | 6                                                           | 1                       | 2                      |
| <b>2</b>    | Nervous system/sense<br>organs  | 14.3                                          | 6                                                           | 2                       | 6                      |
| <b>3</b>    | Cardiovascular/circulatory      | 12.8                                          | 6                                                           | 3                       | 10                     |
| <b>4</b>    | Skin/subcutaneous               | 12.2                                          | 6                                                           | 2                       | 10                     |
| <b>5</b>    | Musculoskeletal                 | 11.7                                          | 6                                                           | 3                       | 8                      |
| <b>6</b>    | General/unspecified             | 10.8                                          | 5                                                           | 2                       | 7                      |
| <b>7</b>    | Digestive                       | 10.3                                          | 6                                                           | 5                       | 11                     |
| <b>8</b>    | Genitourinary                   | 9.3                                           | 6                                                           | 4                       | 13                     |
| <b>9</b>    | Endocrine                       | 9.2                                           | 6                                                           | 3                       | 13                     |
| <b>10</b>   | Supplementary<br>classification | 8                                             | 3                                                           | 1                       | 3                      |
| <b>11</b>   | Psychological                   | 7.2                                           | 5                                                           | 7                       | 12                     |
| <b>12</b>   | Pregnancy/perinatal             | 3.8                                           | 3                                                           | 7                       | 16                     |
| <b>13</b>   | Blood/blood-forming<br>organs   | 3.7                                           | 4                                                           | 11                      | 13                     |
| <b>14</b>   | Injury/poisoning                | 3.2                                           | 2                                                           | 5                       | 12                     |
| <b>15</b>   | Social problems                 | 2.8                                           | 3                                                           | 12                      | 13                     |
| <b>16</b>   | Cancer                          | 2.5                                           | 3                                                           | 11                      | 14                     |
| <b>17</b>   | Infectious/parasitic            | 2.5                                           | 2                                                           | 9                       | 12                     |

\*Higher scores mean the condition was reported as a more common reason for visits in more studies.

†Studies included in this analysis were Binns et al. 2007, Brueton et al. 2010, Mash et al. 2012, Ministry of Health 2004, Murphy et al. 2015, Sayer & Britt 1996.
